# Supplementary material for: Long-term live imaging and multiscale analysis identify heterogeneity and core principles of epithelial organoid morphogenesis
Source: PubMed Central journal article supplement (PMC7903752; doi:10.1186/s12915-021-00958-w), 2021-02-24
Supplement: 12915_2021_958_MOESM2_ESM.pdf [file 12915_2021_958_MOESM2_ESM.pdf]

Methodology

Light sheet

Bright field

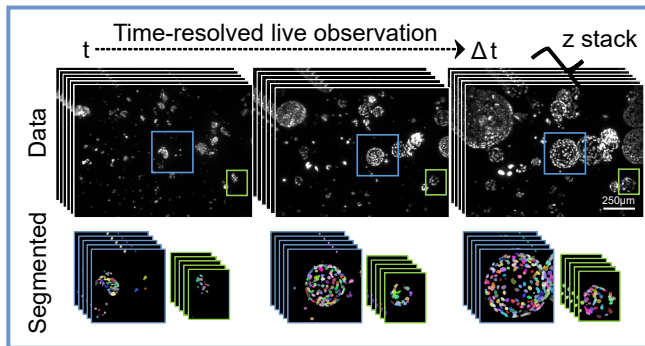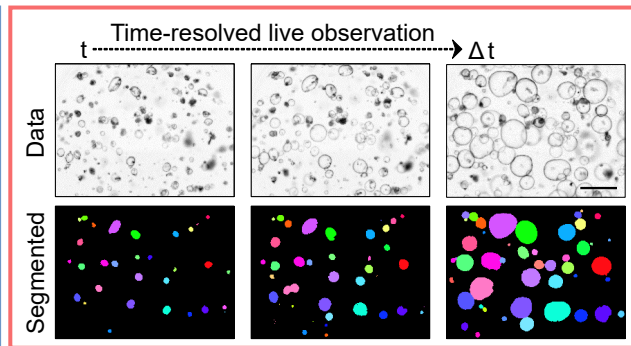

Levels of spatial resolution

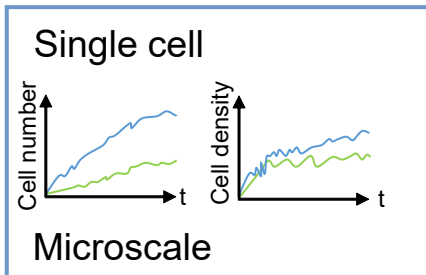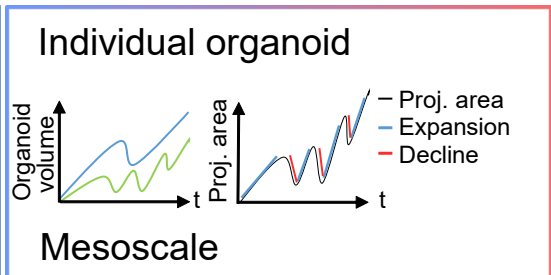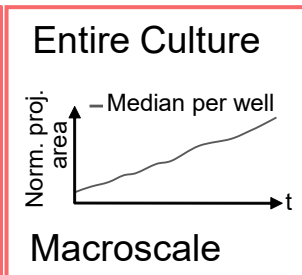

High-content

High-throughput
