# Supplementary material for: Long-term live imaging and multiscale analysis identify heterogeneity and core principles of epithelial organoid morphogenesis
Source: Springer Nature journal article supplement (doi:10.1186/s12915-021-00958-w), 2021-02-24

Rotation

Size oscillation events

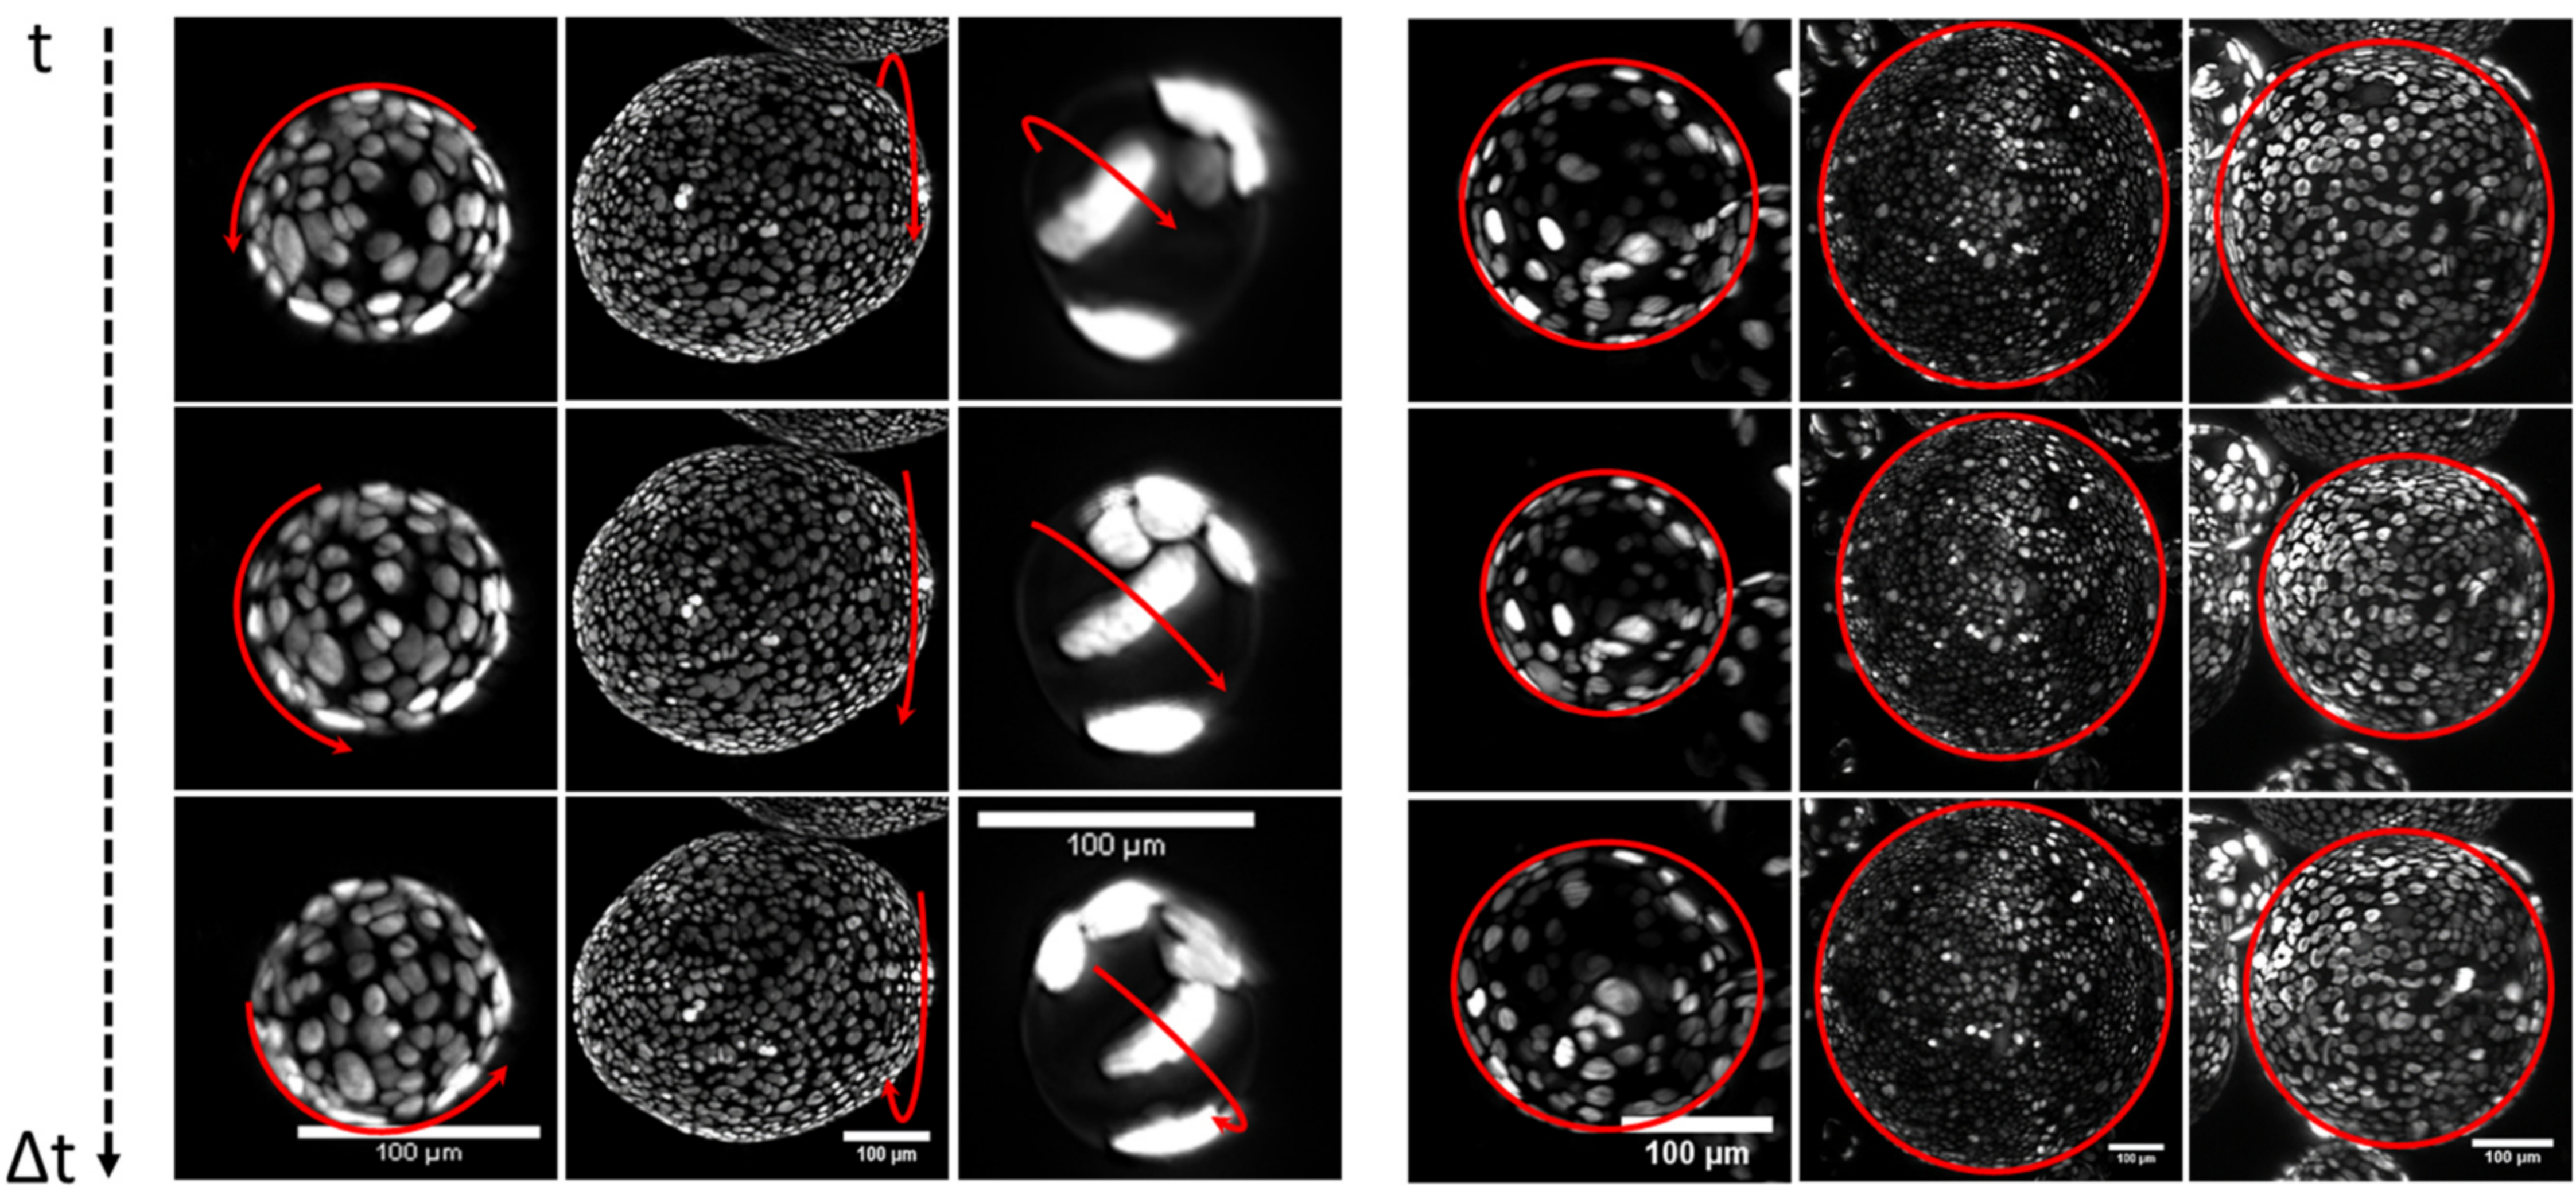

Formation

Luminal dynamics

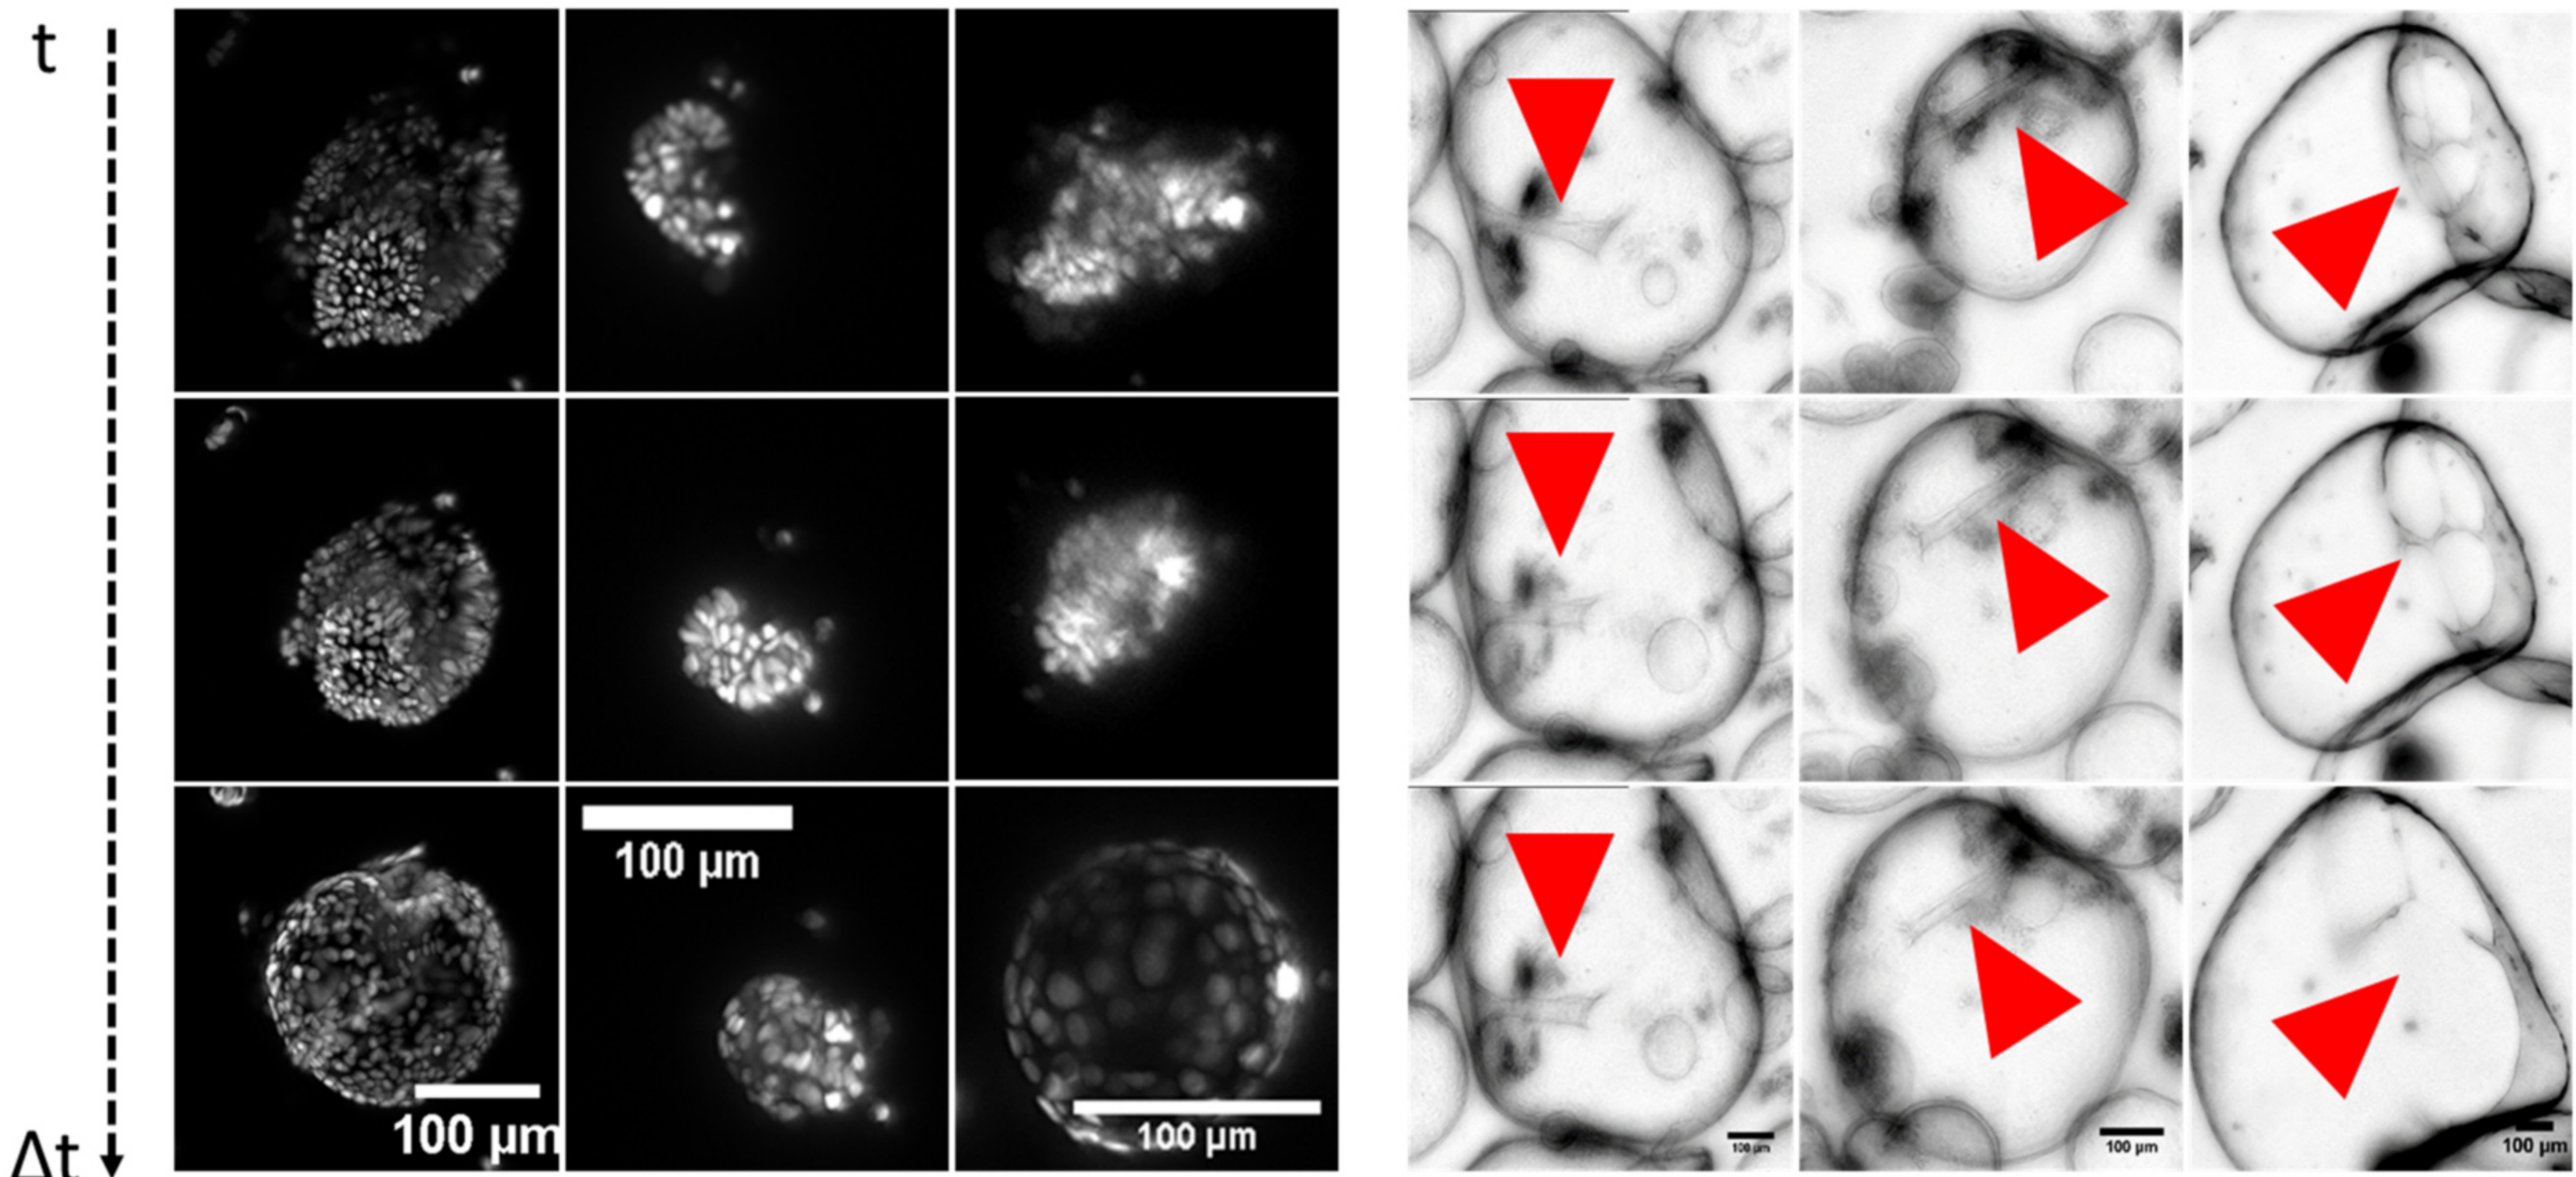

Cell division processes at day 6

day 5

day 4

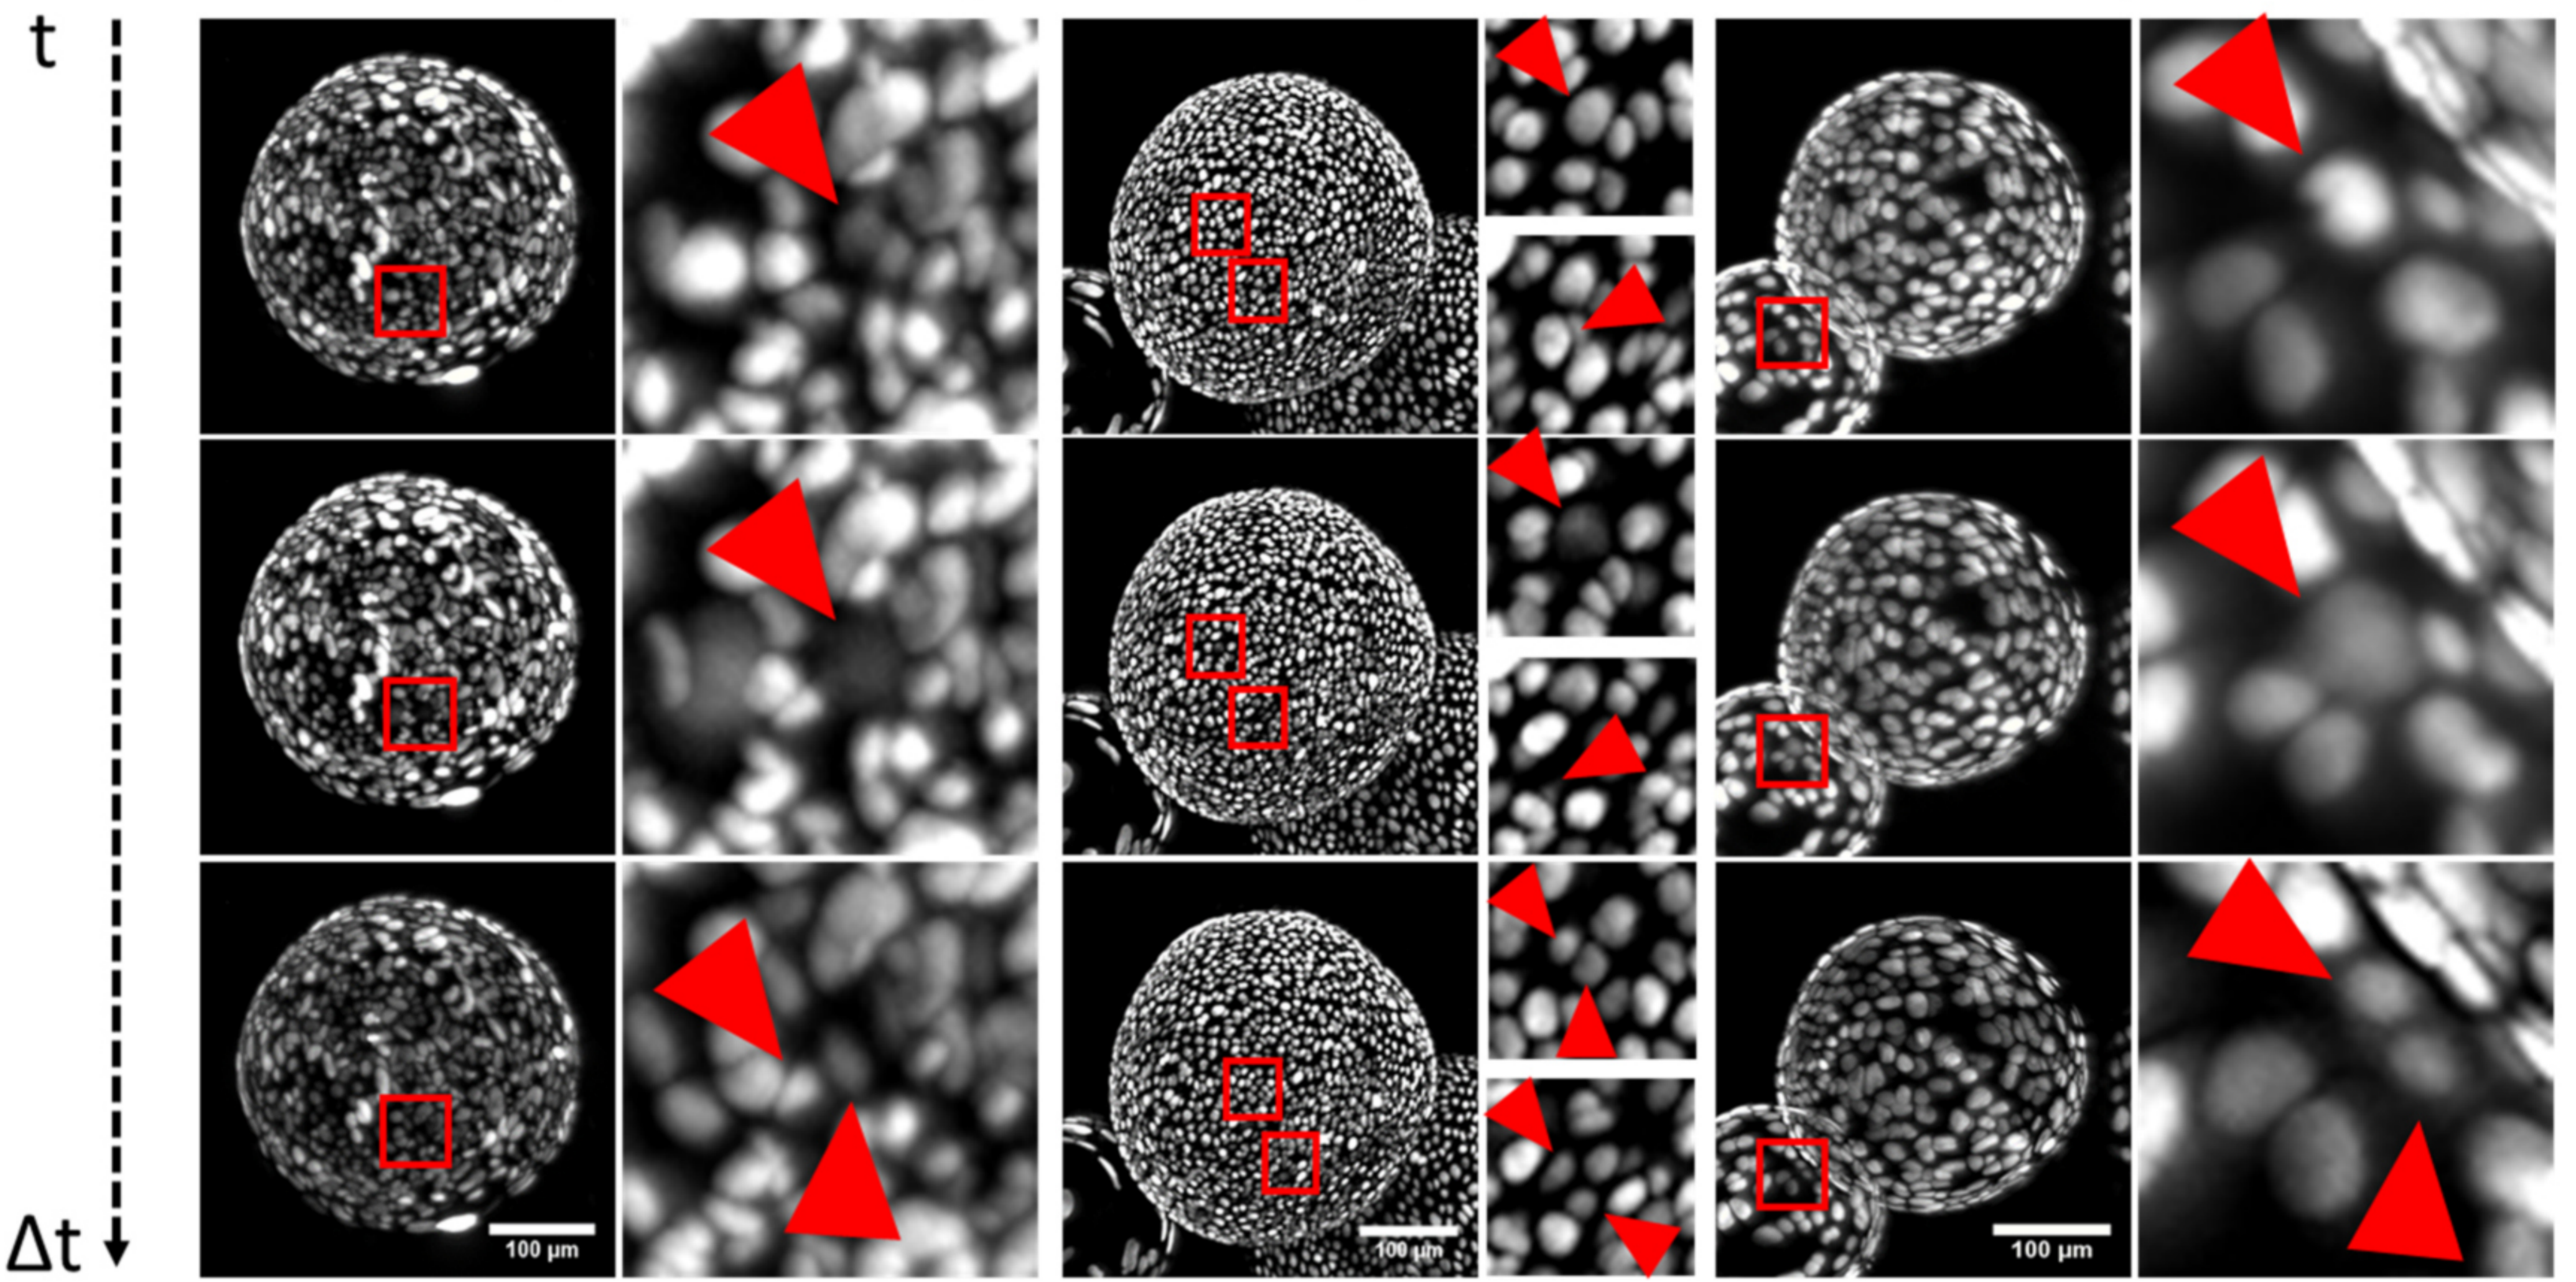

Fusion

Cell size and density

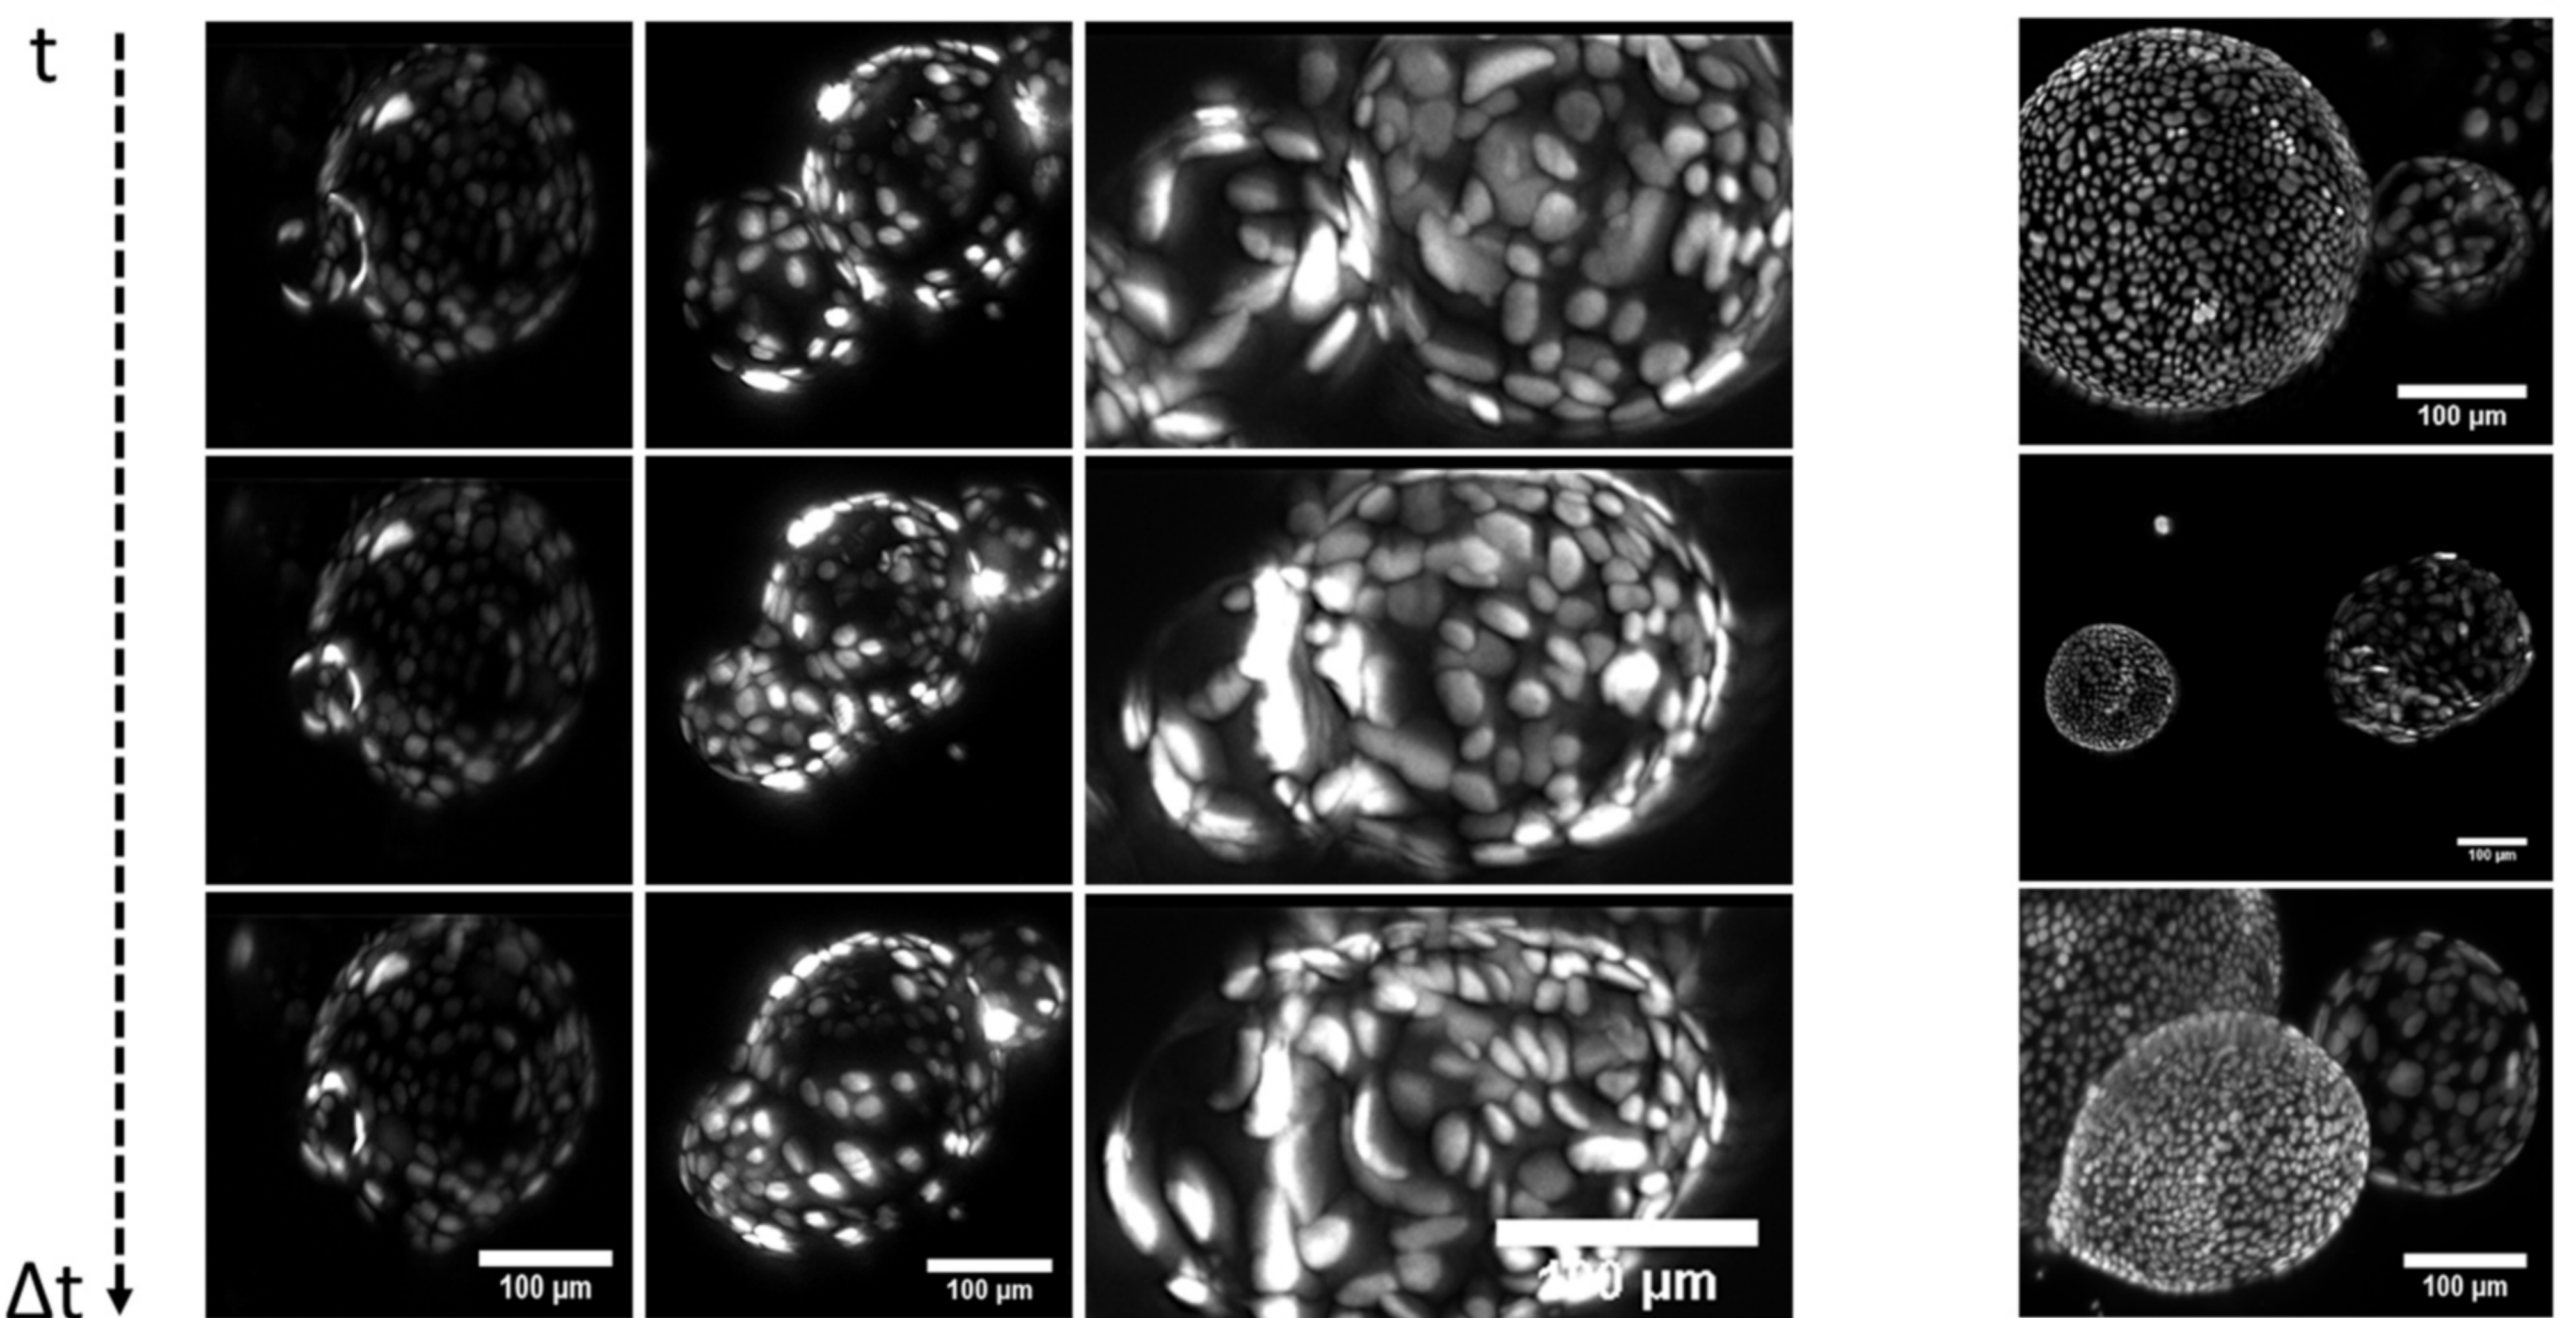

Supplement: MOESM9 [file 12915_2021_958_MOESM9_ESM.pdf]
