# Supplementary material for: Long-term live imaging and multiscale analysis identify heterogeneity and core principles of epithelial organoid morphogenesis
Source: Springer Nature journal article supplement (doi:10.1186/s12915-021-00958-w), 2021-02-24

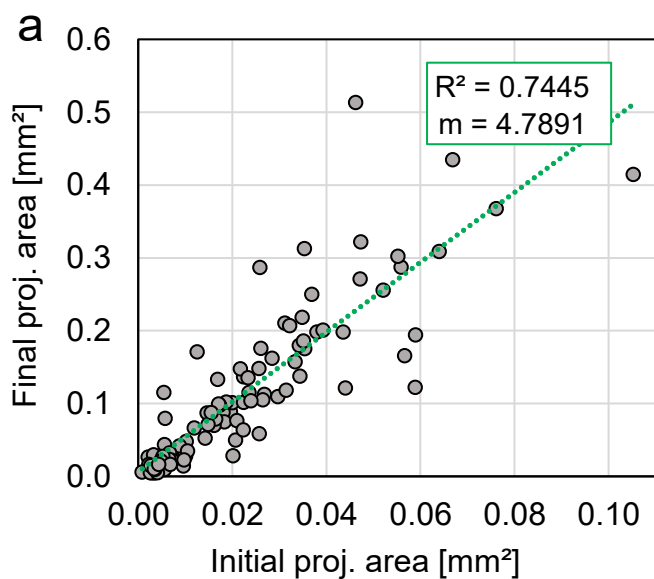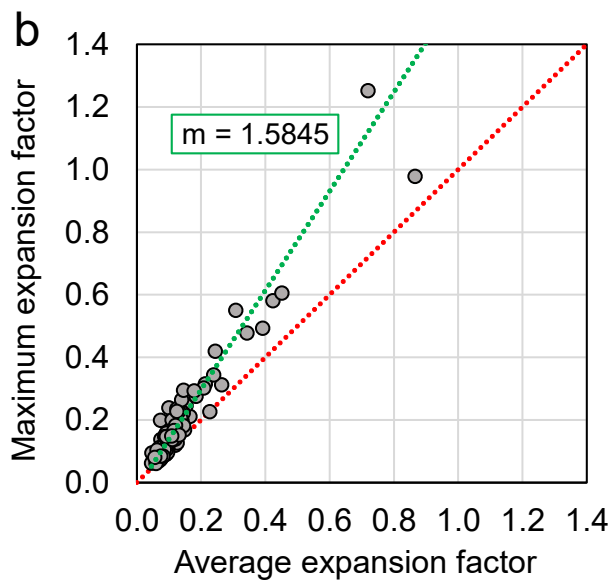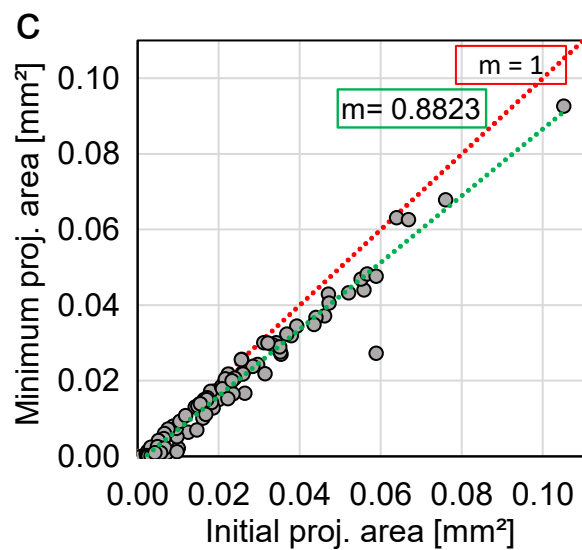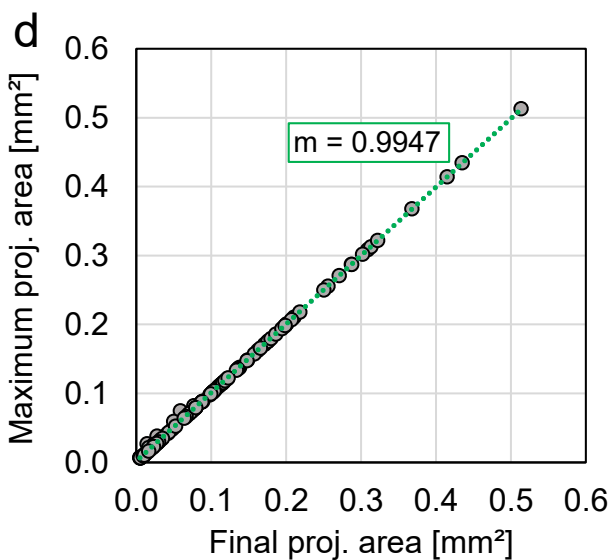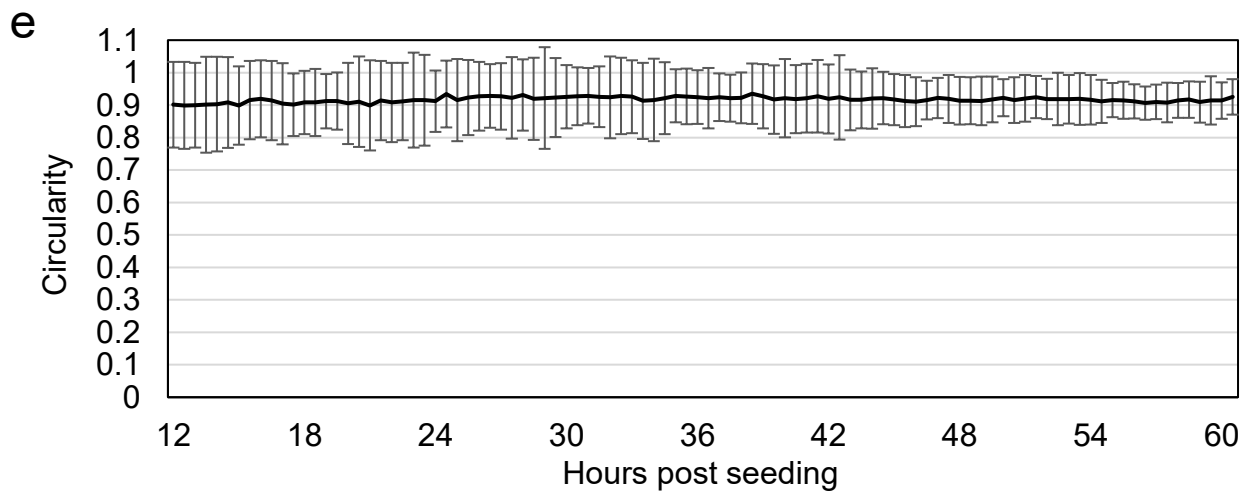

Supplement: MOESM14 [file 12915_2021_958_MOESM14_ESM.pdf]
