# Supplementary material for: Long-term live imaging and multiscale analysis identify heterogeneity and core principles of epithelial organoid morphogenesis
Source: BMC Biol. 2021 Feb 24;19:37. doi: 10.1186/s12915-021-00958-w (PMC7903752; doi:10.1186/s12915-021-00958-w)
Supplement: Supplementary file 23 — Additional file 23: Table S1. Used settings for the segmentation and post-processing of the data obtained with the light-sheet pipeline. Table S2. Evaluation of segmentation performance for different organoids. The performance was measured against a manually determined ground truth for organoid I (red), II (blue) and III (green). The performance metrics recall, precision and F score are determined from the number of true positives, false negatives and false positives. Values range from 0 (worst performance) to 1 (optimal performance). GT: number of cell nuclei in the ground truth; SC: number of cell nuclei determined by segmentation; TP: true positives; FN: false negatives; FP: false negatives. [file 12915_2021_958_MOESM23_ESM.pdf]

Additional file 21: Table S1-S2

**Table S1:** Used settings for the segmentation and post-processing of the data obtained with the light-sheet pipeline

| Segmentation settings         |      | Post processing settings |       |
|-------------------------------|------|--------------------------|-------|
| NucleiFilterRange             | 2    | Alpha                    | 150   |
| NucleiThresholdRange          | 10   | OutlierDistanceThreshold | 50    |
| NucleiMeanFactor              | 1    | EdgeDistanceThreshold    | 50    |
| NucleiStandardDeviationFactor | 0    | NucleiMinCount           | 50    |
| NucleiBackgroundFactor        | 0.9  | NucleiMaxCount           | 10000 |
| HoleFillingRange              | 1    |                          |       |
| MaxDetectionRange             | 0.12 |                          |       |
| NucleiSeedDetectionMinRadius  | 1    |                          |       |
| NucleiSeedDetectionMaxRadius  | 4    |                          |       |
| NucleiSeedDilation            | 1    |                          |       |

**Table S2:** Evaluation of segmentation performance for different organoids. The performance was measured against a manually determined ground truth for organoid I (red), II (blue) and III (green). The performance metrics recall, precision and F score are determined from the number of true positives, false negatives and false positives. Values range from 0 (worst performance) to 1 (optimal performance). GT: number of cell nuclei in the ground truth; SC: number of cell nuclei determined by segmentation; TP: true positives; FN: false negatives; FP: false positives.

|              | GT  | SC  | TP  | FN | FP | recall | precision | accuracy |
|--------------|-----|-----|-----|----|----|--------|-----------|----------|
| organoid I   | 178 | 180 | 153 | 25 | 27 | 0.86   | 0.85      | 0.75     |
| organoid II  | 93  | 92  | 79  | 14 | 14 | 0.85   | 0.85      | 0.74     |
| organoid III | 174 | 182 | 161 | 13 | 21 | 0.93   | 0.89      | 0.83     |
